# Supplementary material for: Increased Regulatory T-Cell Activity and Enhanced T-Cell Homeostatic Signaling in Slow Progressing HIV-infected Children
Source: PubMed Central journal article supplement (PMC6379343; doi:10.3389/fimmu.2019.00213), 2019-02-12
Supplement: Table_1.pdf [file Table_1.pdf]

## Suppl table 1:

|               |                 |           |                  |
|---------------|-----------------|-----------|------------------|
| CD4           | BUV 496         | SK3       | BD               |
| FoxP3         | BV 421          | PCH101    | ebioscience      |
| CD8           | V500            | RPA-T8    | BD               |
| HLA-DR        | BV 605          | G46-6     | BD               |
| CD45RA        | BV 650          | HI100     | BD               |
| CD25          | BV 711          | BC96      | biolegend        |
| Ki-67         | BV 785          | B56       | BD               |
| CD39          | AlexaFluor 488  | TU66      | BD               |
| CCR7          | PerCp-Cy5-5     | G043H7    | biolegend        |
| CD127         | PE-Cy5          | R34.34    | Beckmann Coulter |
| CD27          | PE-Cy7          | M-T271    | biolegend        |
| CD3           | PE-CF594        | UGHT1     | BD               |
| IL-10         | PE              | JES3-19F1 | biolegend        |
| TGF- $\beta$  | Alexa Fluor 647 | TW4-6H10  | biolegend        |
| TNF- $\alpha$ | AlexaFluor 700  | Mab11     | BD               |
